# Supplementary material
Source: Springer Nature journal article supplement (https://www.springermedizin.de/resource/supplementary/12875_2010_469_MOESM1_ESM.pdf/9434672)
Supplement: MOESM1 [file 9434672]

**383 patients identified by searching in the registers**

Excluded n = 96

**46 patients with stroke or TIA diagnoses registered inappropriately in the medical records<sup>1)</sup>**

**20 patients who had their stroke or TIA after 1 May 2005<sup>2)</sup>**

**30 patients who moved away from the GPHC's area**

**287 patients identified for the survey**

Excluded n = 47

**37 patients with dementia or other cognitive impairment**

**5 patients who did not understand Swedish**

**5 patients who died during the preparatory phase of the study**

A total of **143 patients** excluded

**240 patients participating in the survey**

responders:  
182 patients

non-responders:  
58 patients
